# Supplementary material for: Nitrogen-doped porous activated carbon derived from cocoon silk as a highly efficient metal-free electrocatalyst for the oxygen reduction reaction
Source: Royal Society of Chemistry journal article supplement (doi:10.1039/c7ra00433h), 2017-01-01
Supplement: c7ra00433h1.pdf [file c7ra00433h1.pdf]

## Supplementary Information

### **Nitrogen doped porous activated carbon derived from cocoon silk as highly efficient metal-free electrocatalyst for oxygen reduction reaction**

Peng Fu,<sup>a</sup> Lihua Zhou,<sup>\*a</sup> Lihua Sun,<sup>a</sup> Baohua Huang,<sup>a</sup> and Yong Yuan,<sup>\*\*b</sup>

<sup>a</sup> Institute of Natural Medicine and Green Chemistry, School of Chemical Engineering and Light Industry, Guangdong University of Technology, Guangzhou, 510006, P.R. China.

<sup>b</sup> Guangdong Key Laboratory of Integrated Agro-environmental Pollution Control and Management, Guangdong Institute of Eco-Environmental Science and Technology, 510650, P.R. China.

**\*Corresponding author:**

E-mail: qhzhoulh@gdut.edu.cn (L. Zhou); Tel: +8620-39322203

E-mail: yuanyong@soil.gd.cn (Y. Yuan); Tel: +8620-87025872

**Table S1 Summary of textural parameters obtained from nitrogen adsorption analysis of these samples**

| Samples  | $S_{\text{BET}}$ (m <sup>2</sup> /g) | Pore volume (cm <sup>3</sup> /g) | Pore size (nm) |
|----------|--------------------------------------|----------------------------------|----------------|
| PAC-600  | 983.9                                | 0.47                             | 1.8            |
| PAC -700 | 1102.3                               | 0.50                             | 1.8            |
| PAC -800 | 1273.8                               | 0.60                             | 1.9            |
| PAC -900 | 1059.4                               | 0.46                             | 1.8            |
| DC -800  | 136.97                               | 0.06                             | 1.9            |

**Table S2 XRD results of the CS-derived carbon nanofibers**

| Samples  | $2\theta$ /° | $d_{(002)}$ /nm | $L_{\text{c}(002)}$ /nm | $L_{\text{a}(101)}$ /nm | $N (L_{\text{c}(002)}/d_{(002)})$ |
|----------|--------------|-----------------|-------------------------|-------------------------|-----------------------------------|
| PAC-600  | 24.62        | 0.3612          | 1.81                    | 2.12                    | 5.01                              |
| PAC -700 | 24.67        | 0.3606          | 1.86                    | 2.68                    | 5.17                              |
| PAC -800 | 24.73        | 0.3597          | 1.93                    | 2.97                    | 5.45                              |
| PAC -900 | 24.75        | 0.3594          | 1.97                    | 3.13                    | 5.48                              |
| DC -800  | 24.72        | 0.3598          | 2.11                    | 3.37                    | 5.86                              |

**Table S3 N functionalities in the porous carbons determined by XPS measurements**

| Samples  | Pyridinic-N1<br>(at.%) | Pyrrolic-N2<br>(at.%) | Graphitic-N3<br>(at.%) | Oxidized-N4<br>(at.%) | Total<br>Nitrogen (at.%) |
|----------|------------------------|-----------------------|------------------------|-----------------------|--------------------------|
| PAC-600  | 3.13                   | 2.42                  | 4.02                   | 2.52                  | <b>12.09</b>             |
| PAC -700 | 1.69                   | 1.47                  | 3.99                   | 2.42                  | <b>9.39</b>              |
| PAC -800 | 0.91                   | 0.86                  | 4.04                   | 1.69                  | <b>7.49</b>              |
| PAC -900 | 0.88                   | 0.78                  | 3.68                   | 1.52                  | <b>6.86</b>              |
| DC -800  | 0.91                   | 1.06                  | 3.85                   | 1.57                  | <b>7.39</b>              |

**Table S4 Summary of the reported ORR performance of various biomass-derived metal-free activated carbon catalysts**

| ORR catalysts        | Precursor                | Activation              | Onset potential (V vs. RHE) | Half-wave potential (V vs. RHE) | Electrolyte                          | Ref.             |
|----------------------|--------------------------|-------------------------|-----------------------------|---------------------------------|--------------------------------------|------------------|
| BZ-800               | <i>Bacillus subtilis</i> | ZnCl <sub>2</sub>       | 0.91                        | 0.76                            | 0.1M KOH                             | [1]              |
| SA-CNF-900           | Spider silk              | ZnCl <sub>2</sub>       | 0.98                        | 0.85                            | 0.1M KOH                             | [2]              |
| BCZA-9-1/2           | Soybean                  | ZnCl <sub>2</sub>       | 0.95                        | 0.84                            | 0.1M KOH                             | [3]              |
| N-CSs                | Fermented rice           | ZnCl <sub>2</sub>       | 0.85                        | 0.81                            | 0.1M KOH                             | [4]              |
| WHC-700              | Water hyacinth           | ZnCl <sub>2</sub>       | 0.98                        | 0.85                            | 0.1M KOH                             | [5]              |
| NCN                  | Chitosan                 | Urea                    | 0.94                        | 0.78                            | 0.1M KOH                             | [6]              |
| HC-900               | Human hair               | NaOH                    | 0.95                        | 0.80                            | 0.1M KOH                             | [7]              |
| LC2-700H             | London plane             | KOH                     | 0.87                        | 0.70                            | 0.1M KOH                             | [8]              |
| NC                   | Okara                    | FeCl <sub>3</sub>       | 0.98                        | 0.86                            | 0.1M KOH                             | [9]              |
| BP350C1000           | Blood protein            | /                       | 0.90                        | 0.78                            | 0.1M KOH                             | [10]             |
| FCN                  | Soy milk                 | /                       | 0.87                        | 0.79                            | 0.1M KOH                             | [11]             |
| Fe-CEW               | Egg white                | FeCl <sub>3</sub>       | 0.89                        | 0.80                            | 0.1M KOH                             | [12]             |
| Fe/N/CNT@PCFs        | Catkin                   | FeCl <sub>3</sub>       | 0.92                        | 0.83                            | 0.1M KOH                             | [13]             |
| CFB                  | Fish bones               | FeCl <sub>3</sub>       | 0.96                        | 0.87                            | 0.1M KOH                             | [14]             |
| AC900NH <sub>3</sub> | Luffa sponge             | KOH                     | 0.97                        | 0.86                            | 0.1M KOH                             | [15]             |
| N-OMCs-800           | Honey                    | /                       | 0.89                        | 0.79                            | 0.1 M KOH                            | [16]             |
| SI-AZ-800            | <i>Gastrodia elata</i>   | ZnCl <sub>2</sub>       | 0.96                        | 0.82                            | 0.1 M KOH                            | [17]             |
| Scup-1000            | Seaweed                  | /                       | 0.96                        | 0.81                            | 0.1 M KOH                            | [18]             |
| TMC900               | Moss                     | /                       | 0.94                        | 0.83                            | 0.1 M KOH                            | [19]             |
| HAZ-800              | Bamboo fungus            | ZnCl <sub>2</sub>       | 0.94                        | 0.79                            | 0.1 M KOH                            | [20]             |
| NPCNs                | Ginkgo leaves            | NH <sub>3</sub>         | 0.92                        | 0.77                            | 0.1 M KOH                            | [21]             |
| N-CNAs               | Monkey grass             | /                       | 0.94                        | 0.81                            | 0.1 M KOH                            | [22]             |
| CS900-ACs            | Silk fibroin             | Steam                   | 0.83                        | /                               | 0.5 M H <sub>2</sub> SO <sub>4</sub> | [23]             |
| GF-700               | Silk                     | KCl                     | 0.58                        | 0.40                            | 0.5M H <sub>2</sub> SO <sub>4</sub>  | [24]             |
| <b>PAC-800</b>       | <b>Cocoon Silk</b>       | <b>ZnCl<sub>2</sub></b> | <b>0.99</b>                 | <b>0.83</b>                     | 0.1M KOH                             | <b>This work</b> |

/ Not mentioned.

The potentials were converted with these equations below:

$$E_{\text{RHE}} = E_{\text{SCE}} + 0.2438 \text{ V} + 0.0591 \times \text{pH}$$

$$E_{\text{RHE}} = E_{\text{Ag/AgCl}} + 0.197 \text{ V} + 0.0591 \times \text{pH}$$

### Reference:

- 1 H. Zhu, J. Yin, X. Wang, H. Wang, and X. Yang, *Adv. Funct. Mater.*, 2013, **3**, 1305–1312.
- 2 L.H. Zhou, P. Fu, X.X. Cai, S.G. Zhou, and Y. Yuan, *Appl. Catal. B Environ.*, 2016, **188**, 31–38.
- 3 F. Liu, H. Peng, X. Qiao, Z. Fu, P. Huang, and S. Liao, *Inter. J. Hydrogen Energy*, 2014, **39**, 10128–10134.
- 4 F. Liu, H. Peng, C. You, Z. Fu, P. Huang, H. Song, and S. Liao, *Electrochim. Acta*, 2014, **138**, 353–359.
- 5 X. Liu, Y. Zhou, W. Zhou, L. Li, S. Huang, and S. Chen, *Nanoscale*, 2015, **7**, 6136–6142.
- 6 Q. Liu, Y. Duan, Q. Zhao, F. Pan, B. Zhang, and J. Zhang, *Langmuir*, 2014, **30**, 8238–8245.
- 7 K. Chaudhari, M. Song, and J. Yu, *Small*, 2014, **10**, 2626–2636.
- 8 B. Zhu, K. Qiu, C. Shang, and Z. Guo, *J. Mater. Chem. A*, 2015, **3**, 5212–5222.

- 9 R. F. Wang, H. Wang, T. B. Zhou, J. Key, Y.J. Ma, Z. Zhang, Q. Z. Wang, and S. Ji, *J. Power Sources*, 2015, **274**, 741-747.
- 10 C.Z. Guo, C.G. Chen, and Z.L. Luo, *J. Power Sources*, 2014, **245**, 841-845.
- 11 C.Z. Zhu, J.F. Zhai, and S.J. Dong, *Chem. Comm.*, 2012, **48**, 9367-9369.
- 12 K.L. Wang, H. Wang, S. Ji, H.Q. Feng, V. Linkov, and R.F. Wang, *RSC Adv.*, 2013, **3**, 12039-12042.
- 13 M. Li, Y.P. Xiong, X.T. Liu, C. Han, Y.F. Zhang, X.J. Bo, and L.P. Guo, *J. Mater. Chem. A*, 2015, **3**, 9658-9667.
- 14 H. Wang, K. Wang, H.H. Song, H. Li, S. Ji, Z.H. Wang, S.X. Li, and R.F. Wang, *RSC Adv.*, 2015, **5**, 48965-48970.
- 15 J.P. Li, S.G. Wang, Y.Q. Ren, Z.H. Ren, Y.J. Qiu, and J. Yu, *Electrochimic Acta*, 2014, **149**, 56-64.
- 16 J. Lu, X.J. Bo, H. Wang, and L.P. Guo, *Electrochimic Acta*, 2013, **108**, 10-16.
- 17 G.S. Gao, H. Fan, Y.L. Chen, L. Li, Y.S. Bando, and D. Golberg, *Nano Energy*, 2013, **2**, 1261-1270.
- 18 M.Y. Song, H.Y. Park, D.S. Yang, D. Bhattacharjya, and J.S. Yu, *Chem. Sus. Chem.*, 2014, **7**, 1755-1763.
- 19 L.H. Zhou, P. Fu, D.H. Wen, Y. Yuan, and S.G. Zhou, *Appl. Catal. B Environ.*, 2016, **181**, 635-643.
- 20 S.Y. Gao, H. Fan, and S.X. Zhang, *J. Mater. Chem. A*, 2014, **2**, 18263-18270.
- 21 S.Y. Gao, X.J. Wei, H. Fan, L.Y. Li, K.R. Geng, and J.J. Wang, *Nano. Energy*, 2015, **13**, 518-526.
- 22 H.M. Zhang, Y. Wang, D. Wang, Y.B. Li, X.L. Liu, P.R. Liu, H.G. Yang, T.C. An, Z.Y. Tang, and H.J. Zhao, *Small*, 2014, **10**, 3371-3378.
- 23 T. Iwazaki, R. Obinata, W. Sugimoto, and Y. Takasu, *Electro. Comum.*, 2009, **11**, 376-378.
- 24 Q.F. Wang, R.P. Zhang, Y.Q. Wu, H. Zhu, J.F. Zhang, M.L. Du, M. Zhang, L. Wang, X.G. Zhang, and X.H. Liang, *RSC Adv.*, 2016, **6**, 34219-34224.

Figure S1

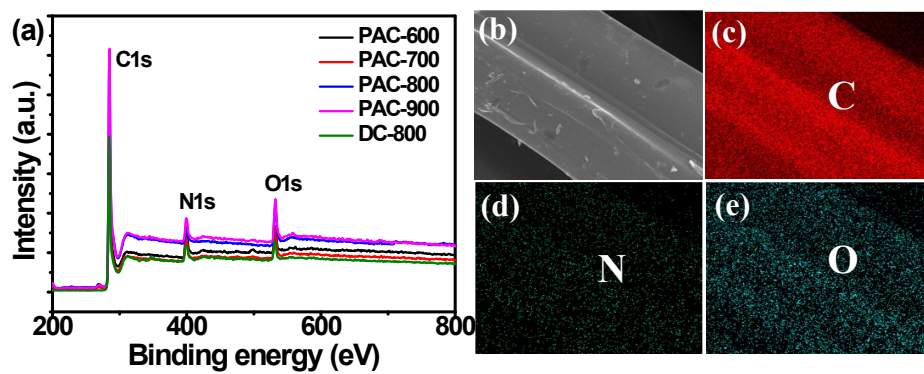

Fig. S1 Survey XPS of PAC-600, PAC -700, PAC-800, PAC -900 and DC-800 (a); SEM image (b) and the corresponding quantitative EDS element mapping of C, N and O of PAC-800 (c ~ e).

Figure S2

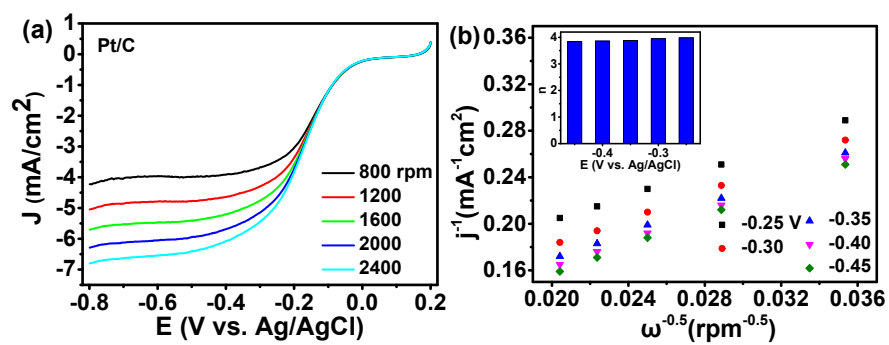

**Fig. S2** (a): LSV curves of Pt/C catalyst in O<sub>2</sub>-saturated 0.1 M KOH solution at scan rate of 10 mV s<sup>-1</sup> at different rotation rates from 800 to 2400 rpm, (b): the corresponding K-L plots at different potentials of Pt/C catalyst, and the insert is the electron transfer numbers during the ORR process.
